# Supplementary material for: Bridging sustainability and catalytic efficiency: Cu7Co alloy-decorated biomass-derived carbon as a highly efficient electrocatalyst for hydrogen generation
Source: Royal Society of Chemistry journal article supplement (doi:10.1039/d4nj01487a), 2024-01-01
Supplement: d4nj01487a1.pdf [file d4nj01487a1.pdf]

## Supporting Information

### **Bridging Sustainability and Catalytic Efficiency: Cu<sub>7</sub>Co Alloy Decorated Biomass-Derived Carbon as a Highly Efficient Electrocatalyst for Hydrogen Generation**

Yali Chen,<sup>a</sup> Cuijiao Zhao,<sup>a\*</sup> Shuyu Wang,<sup>a</sup> Li Zhang,<sup>a</sup> Guoqiang Liu,<sup>b</sup> Weiji Dai,<sup>a</sup>  
Yudong Zhang,<sup>a</sup> Can Cui,<sup>a</sup> Saifang Huang<sup>a\*</sup>

<sup>a</sup> School of Materials Science and Engineering, Jiangsu University of Science and Technology, Zhenjiang 212003, China.

<sup>b</sup> School of Materials Science and Engineering, Anhui Province Key Laboratory of Efficient Conversion and Solid-State Storage of Hydrogen & Electricity, Anhui University of Technology, Maanshan 243002, China.

#### **\*Corresponding Authors**

E-mail: [202100000134@just.edu.cn](mailto:202100000134@just.edu.cn) (C. Zhao); [s.huang@just.edu.cn](mailto:s.huang@just.edu.cn) (S. Huang)

## 1. Supplementary Notes

**Computational Details.** All DFT calculations were carried out via the Vienna ab initio Simulation Package (VASP)<sup>1, 2</sup> and the projector augmented wave (PAW) formula.<sup>3, 4</sup> During the structure optimization, the convergence criterion of total energy was set to  $1 \times 10^{-7}$  eV, and the atoms were relaxed until the force acting on each atom was less than  $0.03 \text{ eV \AA}^{-1}$ . A plane-wave cutoff energy of 520 eV was used in all computations. Brillouin-zone sampling was sampled with  $12 \times 12 \times 12$  Monkhorst-Pack grid for bulk lattice optimizations and  $5 \times 5 \times 1$  for slab model calculations.<sup>5</sup> The lattice constants of Cu were optimized to 3.63 Å. The bottom one layers of three layers were fixed in slab model, and each slab model was separated from its neighbors by a sufficiently thick vacuum layer. A  $(4 \times 4)$  Cu (111) surface with one surface atom replaced with a Co atom. The binding energies of hydrogen ( $\Delta E_H$ ) were obtained from the energies of isolated  $H_2$ .

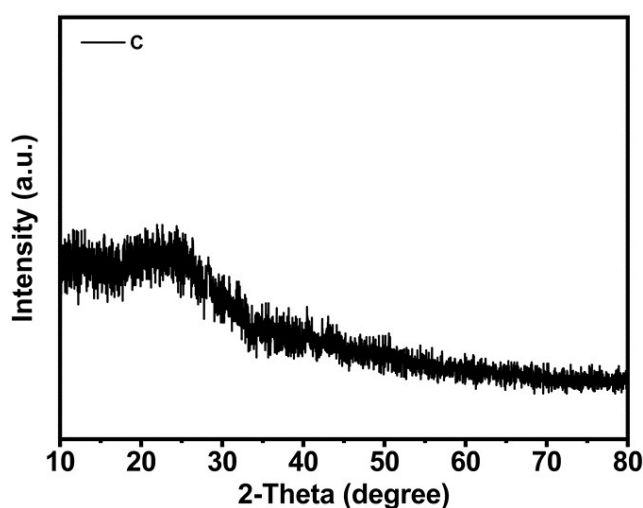

Figure S1. XRD pattern of coconut shell derived carbon.

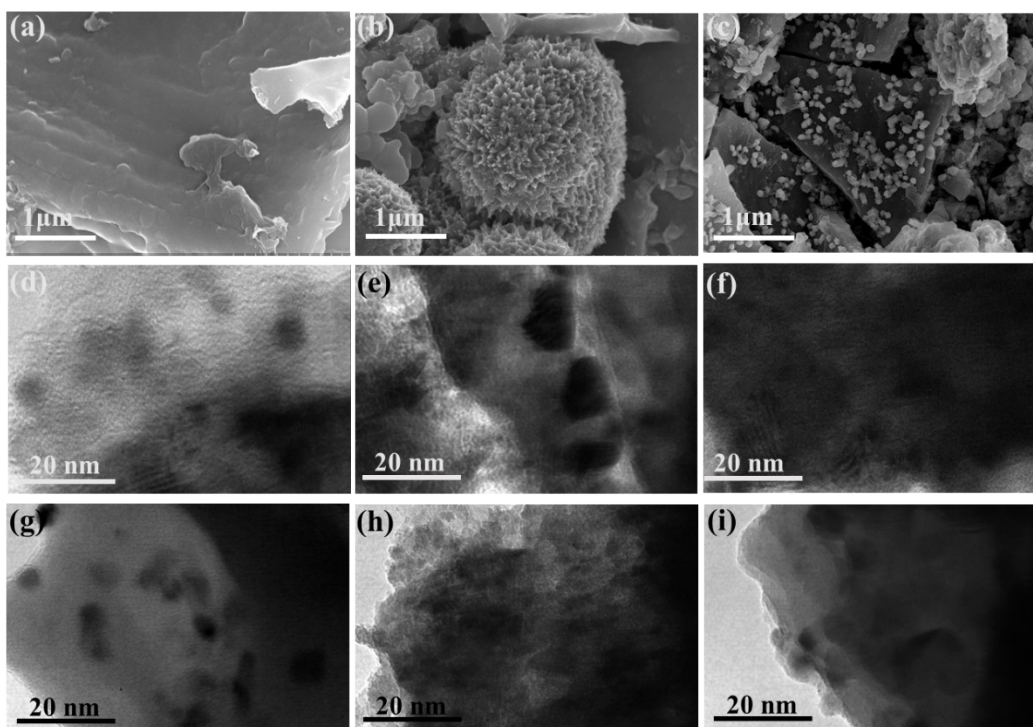

**Figure S2.** SEM images of (a) C, (b) Co/C, (c) Cu/C, TEM images of (d) CuCo<sub>3</sub>/C, (e) CuCo/C, (f) Cu<sub>3</sub>Co/C, (g) Cu<sub>5</sub>Co/C, (h) Cu<sub>7</sub>Co/C, and (i) Cu<sub>8</sub>Co/C.

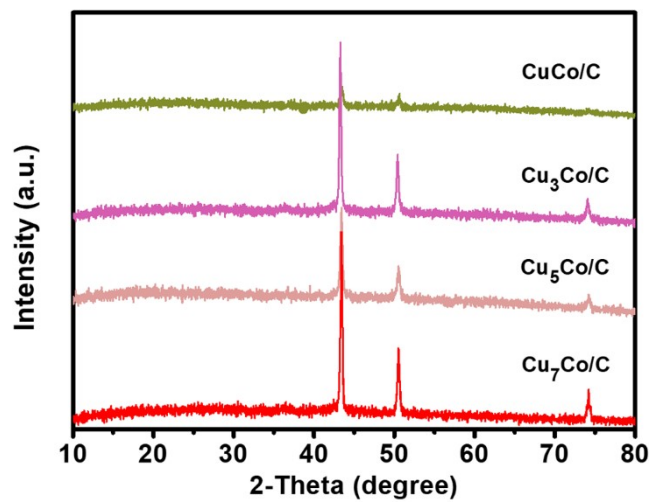

**Figure S3.** XRD patterns of CuCo/C, Cu<sub>3</sub>Co/C, Cu<sub>5</sub>Co/C and Cu<sub>7</sub>Co/C catalysts.

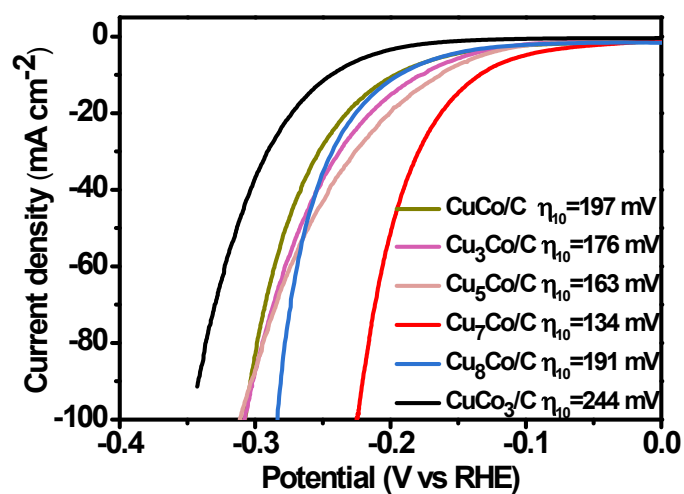

**Figure S4.** LSV curves of CuCo/C, Cu<sub>3</sub>Co/C, Cu<sub>5</sub>Co/C, Cu<sub>7</sub>Co/C, Cu<sub>8</sub>Co/C and CuCo<sub>3</sub>/C catalysts in 1.0 M KOH.

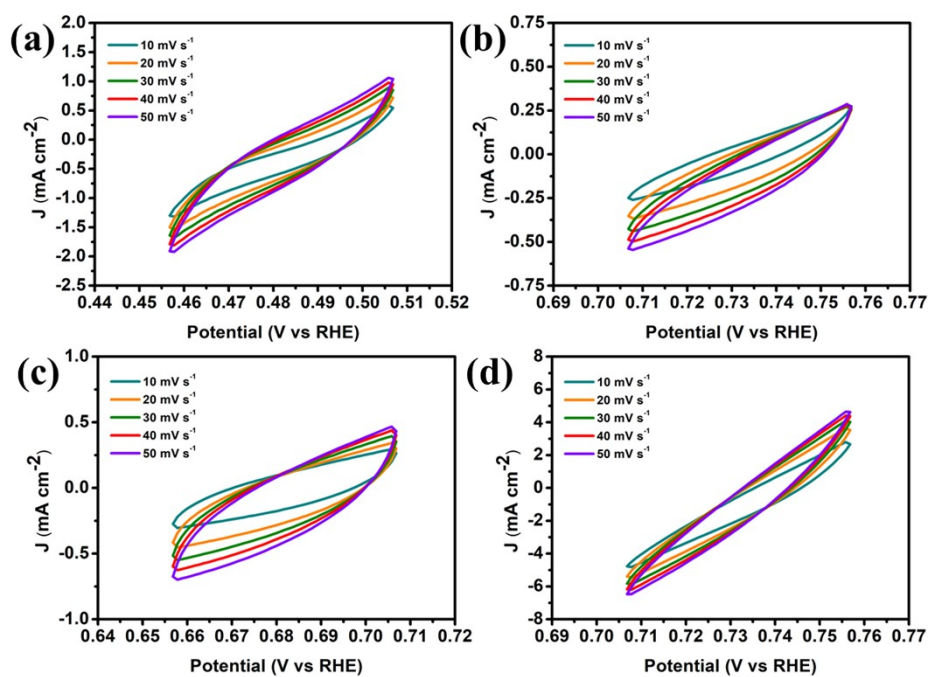

**Figure S5.** CV curves at different scanning rates of (a) C, (b) Co/C, (c) Cu/C, and (d) Cu<sub>7</sub>Co/C.

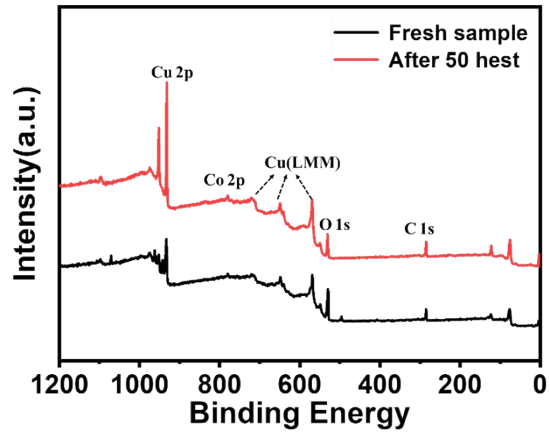

**Figure S6.** XPS survey spectra of Cu<sub>7</sub>Co/C catalyst.

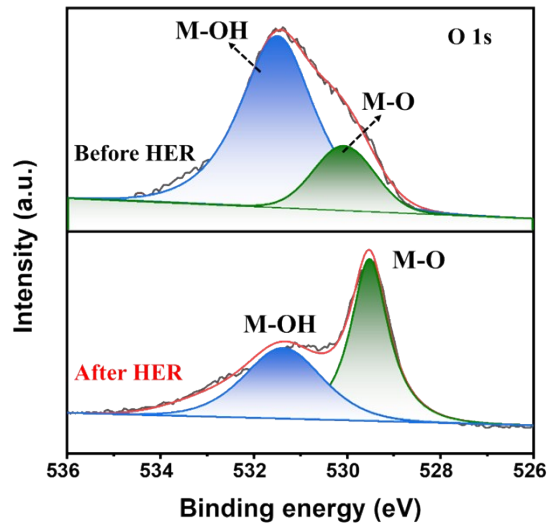

**Figure S7.** High-resolution XPS spectra of Cu<sub>7</sub>Co/C electrode for O 1s.

**Table S1.** Comparison of HER performances of Metallic carbon-based electrocatalysts reported recently.

| Catalyst                                      | $\eta_{10}$<br>(mV) | Tafel slope<br>(mV dec <sup>-1</sup> ) | Electrolyte                          | References                                                           |
|-----------------------------------------------|---------------------|----------------------------------------|--------------------------------------|----------------------------------------------------------------------|
| Cu <sub>7</sub> Co/C                          | 134                 | 94                                     | 1.0 M KOH                            | this work                                                            |
| Ni <sub>3</sub> C/CNT                         | 132                 | 49                                     | 1.0 M KOH                            | <i>Journal of Materials Chemistry A</i> 2018, 6, 4297-4304.          |
| Ni <sub>0.25</sub> Fe <sub>0.75</sub> -N, P,S | 250                 | 84                                     | 1.0 M KOH                            | <i>Journal of Power Sources</i> 2018, 401, 312-321.                  |
| NiO <sub>x</sub> -AC-500                      | 180                 | 121                                    | 1.0 M KOH                            | <i>Carbon</i> 2020, 157: 515-524.                                    |
| Co-CoO/BC yolk-shell                          | 210                 | 93                                     | 0.5 M H <sub>2</sub> SO <sub>4</sub> | <i>International Journal of Hydrogen Energy</i> 2019, 44, 6525-6534. |
| CoS <sub>2</sub> /MoS <sub>2</sub> /NC        | 215                 | 80                                     | 0.5 M H <sub>2</sub> SO <sub>4</sub> | <i>Journal of Alloys and Compounds</i> 2022, 891, 161962.            |
| PS/MoS <sub>2</sub>                           | 154                 | 71                                     | 0.5 M H <sub>2</sub> SO <sub>4</sub> | <i>Materials Chemistry and Physics</i> 2020, 252, 123244.            |
| NiSe <sub>2</sub> @C                          | 206                 | 59                                     | 1.0 M KOH                            | <i>International Journal of Hydrogen Energy</i> 2024, 52, 709-717.   |
| Co-Al-O <sub>x</sub> /S <sub>y</sub> @LSCN    | 267                 | 23                                     | 1.0 M KOH                            | <i>Carbon</i> 2021, 184, 386-399.                                    |
| Cu/Cu <sub>2</sub> OCuO/rGO                   | 118                 | 74                                     | 0.5 M H <sub>2</sub> SO <sub>4</sub> | <i>Inorganic Chemistry</i> 2022, 62, 601-608.                        |

**Table S2.** Calculated H-binding energies ( $\Delta E_H$ ) for Cu (111) and Cu<sub>7</sub>Co (111) surfaces.

|                    | No Absorp (eV) | Absorp (eV) | $\Delta E_H$ (eV) |
|--------------------|----------------|-------------|-------------------|
| Cu                 | -163.942       | -167.535    | -0.20946          |
| Cu <sub>7</sub> Co | -166.409       | -170.303    | -0.50972          |

## References

- [1] G. Kresse and J. Furthmüller, *Physical review B*, 1996, **54**, 11169.
- [2] G. Kresse and J. Hafner, *Physical review B*, 1993, **47**, 558.
- [3] J. P. Perdew, K. Burke and M. Ernzerhof, *Physical review letters*, 1996, **77**, 3865.
- [4] P. E. Blöchl, *Physical review B*, 1994, **50**, 17953.
- [5] H. J. Monkhorst and J. D. Pack, *Physical review B*, 1976, **13**, 5188.
